# Supplementary material
Source: publisher site journal article supplement (https://www.dovepress.com/article/586054)
Supplement: Supplementary file 1 [file 586054_Supplementary%20Material_R2.docx]

Supplementary materials

**
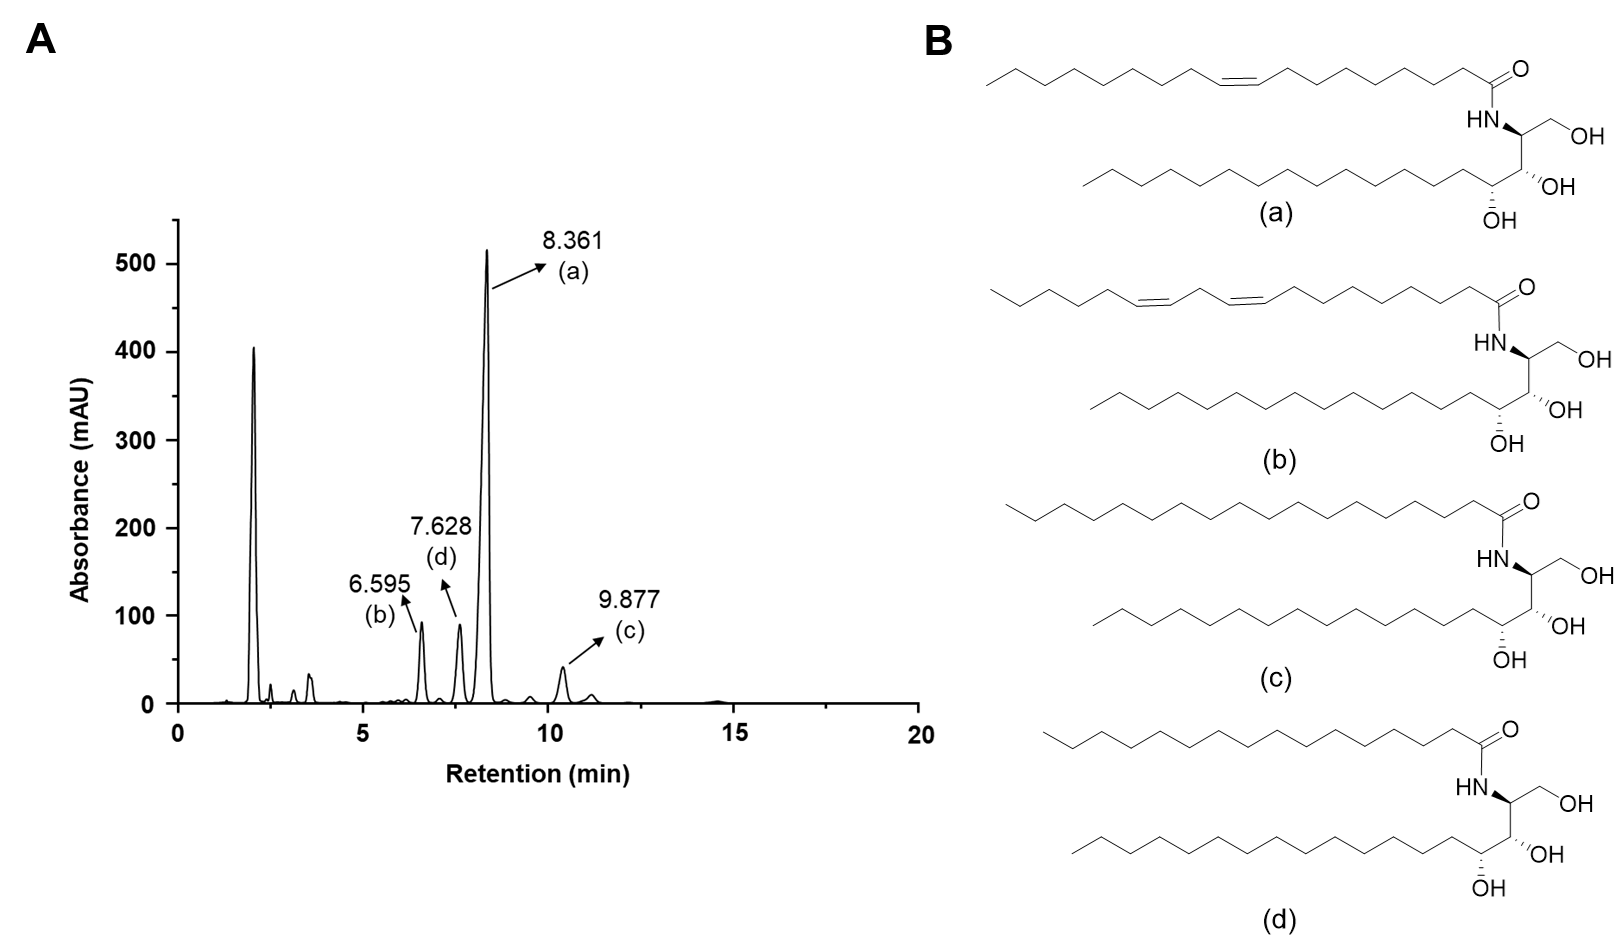
**

**Supplementary Figures S1. HPLC analysis of MO-CER NPs.** (A) HPLC chromatogram of MO-CER NPs. The retention times for *N*-linoleoyl-phytosphingosine (b), *N*-palmitoyl-phytosphingosine (d), *N*-oleoyl-phytosphingosine (a), and *N*-stearoyl-phytosphingosine (c) were 6.595, 7.628, 8.361 and 9.877 min, respectively. (B) Chemical structures of major CER NPs in MO-CER NPs.


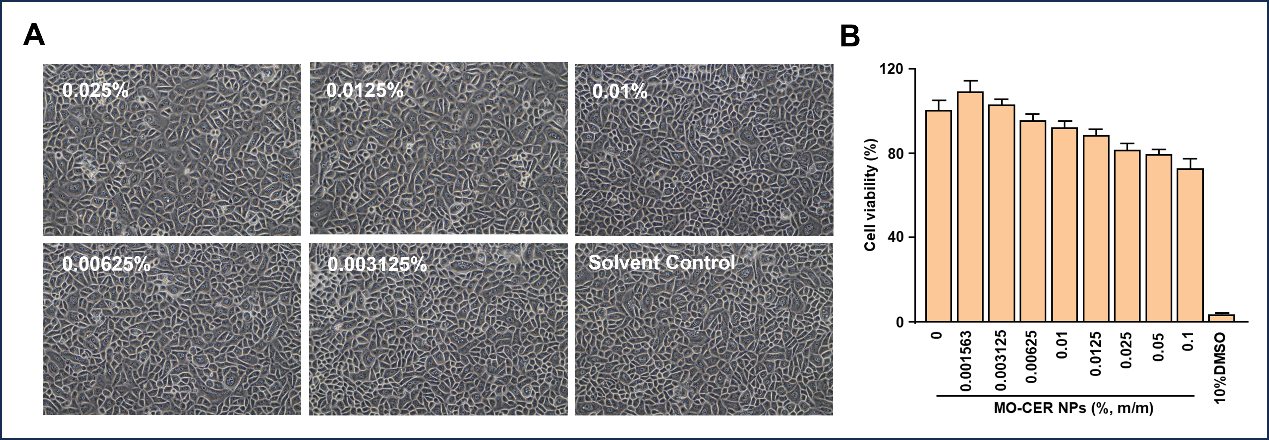


**Supplementary Figures S2.** **Impact of MO-CER NPs concentration on HaCaT cell viability.** (A) Representative images of HaCaT cells treated with gradient diluted MO-CER NPs. (B) Measurement of HaCaT cells viability using the MTT assay.
